# Supplementary material for: Lipid-Independent Regulation of PLIN5 via IL-6 through the JAK/STAT3 Axis in Hep3B Cells
Source: MDPI journal article supplement (doi:10.3390/ijms24087219), 2023-04-13
Supplement: s1 [file s1]

# Lipid-Independent Regulation of PLIN5 via IL-6 through the JAK/STAT3 Axis in Hep3B Cells

Marinela Krizanac, Paola Berenice Mass Sanchez, Sarah K. Schröder, Ralf Weiskirchen, and Anastasia Asimakopoulos

**Table S1.** Antibodies used for Western blot analysis\*

| Primary antibodies              |            |                |            |          |        |
|---------------------------------|------------|----------------|------------|----------|--------|
| Antibody                        | Cat. No.   | Supplier       | Size (kDa) | Dilution | Source |
| Akt                             | #4685      | Cell Signaling | 60         | 1:1000   | r      |
| CASP3                           | #9662      | Cell Signaling | 35         | 1:1000   | r      |
| cl. CASP3                       | #9664      | Cell Signaling | 17/19      | 1:1000   | r      |
| cl. PARP                        | sc-56196   | Santa Cruz     | 90         | 1:1000   | r      |
| ERK1/2                          | #9101      | Cell Signaling | 42/44      | 1:1000   | r      |
| GAPDH                           | sc-32233   | Santa Cruz     | 38         | 1:1000   | m      |
| Histone H3                      | #4499      | Cell Signaling | 17         | 1:2000   | r      |
| IL-6R                           | sc-373708  | Santa Cruz     | 50/80      | 1:750    | m      |
| LCN2                            | AF1757     | R&D Systems    | 25         | 1:1000   | g      |
| NF-κB                           | sc-8008    | Santa Cruz     | 65         | 1:1000   | m      |
| pAkt                            | #4060      | Cell Signaling | 60         | 1:1000   | r      |
| PARP                            | #9532      | Cell Signaling | 116/89     | 1:1000   | r      |
| pERK1/2                         | #9102      | Cell Signaling | 42/44      | 1:1000   | r      |
| PLIN5                           | 26951-1-AP | Proteintech    | 50         | 1:1000   | r      |
| pNF-κB                          | #3031      | Cell Signaling | 65         | 1:1000   | r      |
| pSMAD2                          | #8828      | Cell Signaling | 52/60      | 1:1000   | r      |
| pSTAT1                          | #9167      | Cell Signaling | 84-91      | 1:1000   | r      |
| pSTAT3                          | #9134      | Cell Signaling | 84-91      | 1:1000   | r      |
| SMAD2/3                         | #8685      | Cell signaling | 52/60      | 1:1000   | r      |
| STAT1                           | sc-464     | Santa Cruz     | 84-91      | 1:1000   | m      |
| STAT3                           | sc-8019    | Santa Cruz     | 84-91      | 1:1000   | m      |
| Vinculin                        | 66305-1-Ig | Proteintech    | 117        | 1:2000   | r      |
| Secondary antibodies            |            |                |            |          |        |
| Antibody                        | Cat. No.   | Supplier       |            | Dilution | Source |
| goat anti-mouse IgG (H+L), HRP  | #31430     | Invitrogen     | NA         | 1:10,000 | g      |
| mouse anti-goat IgG (H+L), HRP  | #31400     | Invitrogen     | NA         | 1:10,000 | m      |
| goat anti-rabbit IgG (H+L), HRP | #31460     | Invitrogen     | NA         | 1:10,000 | g      |

\* Abbreviations used are: g, goat; H+L, respective antibody contains 2 heavy chains (H) and 2 light chains (L); HRP, horseradish peroxidase; IgG, immunoglobulin G; m, mouse; NA, not applicable; r, rabbit.

**Table S2.** Oligonucleotides used for RT-qPCR

| Human Gene   | Accession No. | Primers                                                                     |
|--------------|---------------|-----------------------------------------------------------------------------|
| <i>PLIN5</i> | NM_001013706  | forward: 5'-gtggccagcagtgctcacggg-3'<br>reverse: 5'-ggagccgagggcgacaaagt-3' |
| <i>IL6R</i>  | NM_000565.4   | forward: 5'-cccctcagcaatgtgtttgt-3'<br>reverse: 5'-ctccgggactgctaactgg-3'   |
| <i>STAT3</i> | NM_139276.3   | forward: 5'-tcctgaagctgacccaggta-3'<br>reverse: 5'-ggcaggtaatgtattgct-3'    |
| <i>GAPDH</i> | NM_002046.7   | forward: 5'-agccacatcgctcagacac-3'<br>reverse: 5'-gcccaatacgaacaaatcc-3'    |

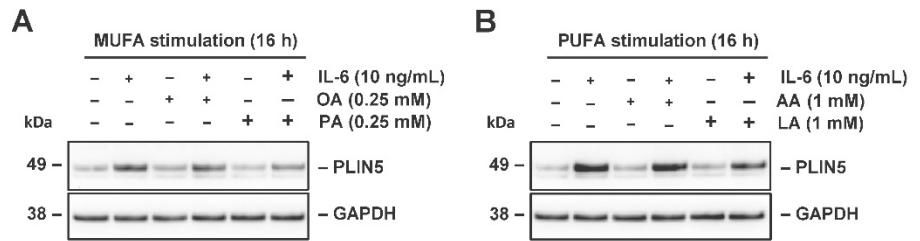

**Figure S1.** Effects of combined stimulation of IL-6 and fatty acids on PLIN5 expression in Hep3B cells. Hep3B cells were treated with IL-6 in combination with either (A) oleic acid (OA) and palmitic acid (PA) or (B) arachidonic acid (AA) and linoleic acid (LA) for 16 h. Expression of PLIN5 was analyzed by Western blot using GAPDH to demonstrate equal protein loading. MUFA, monounsaturated fatty acids; PUFA, polyunsaturated fatty acids

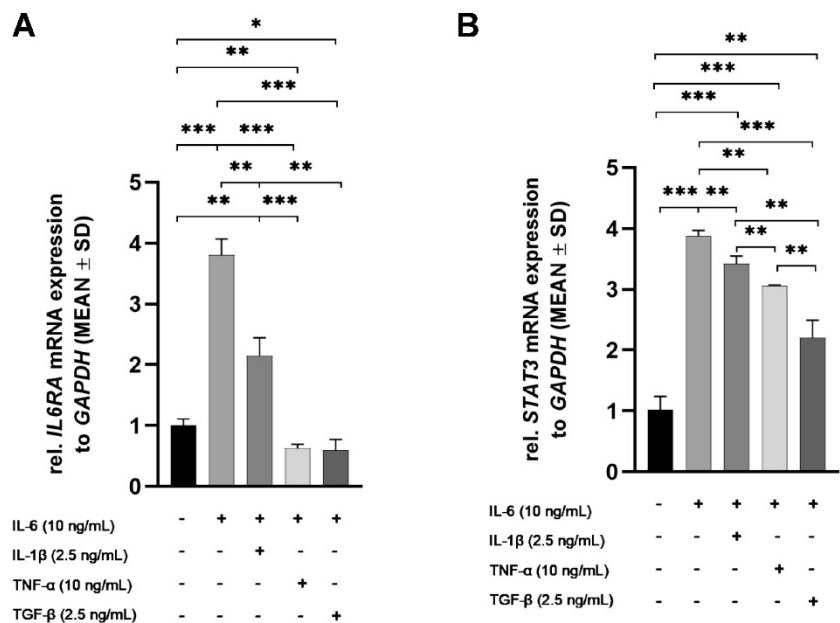

**Figure S2.** Impact of different cytokines on *IL6RA* and *STAT3* mRNA expression in Hep3B cells. Expression of (A) *IL6RA* and (B) *STAT3* mRNA in Hep3B cells after stimulation with IL-6, IL-1β, TNF-α, and TGF-β as assessed by RT-qPCR. Untreated cells were used as controls. For RT-qPCR results, data are shown as mean ± SD of 3 independent experiments performed in triplicate and measured in technical replicates. Significant differences between the groups in (A) or (B) are marked by asterisks (\* $p < 0.05$ , \*\* $p < 0.01$ , \*\*\* $p < 0.001$ ).

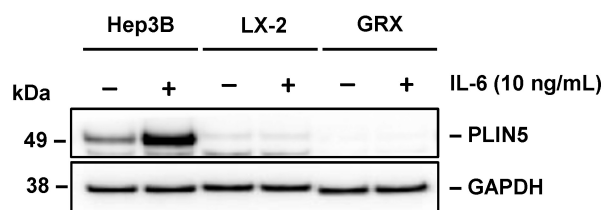

**Figure S3.** Treatment of hepatic stellate cell derivatives with IL-6. Representative Western blot analysis showing that the hepatic stellate cell derivatives LX-2 and GRX cells do not induce PLIN5 expression after treatment with IL-6 (10 ng/mL) for 24 h. In this analysis, Hep3B cells were used as controls and probing with GAPDH served as a control to demonstrate equal protein loading.
